# Supplementary material
Source: PubMed Central journal article supplement (PMC7339276)
Supplement: ajcr0010-1793-f2.pdf [file ajcr0010-1793-f2.pdf]

## Outcomes of surgery for cervical SCC and ADC

**Supplementary Table 1.** Stage variation from FIGO stage to AJCC pathologic stage

| FIGO stage    |                            | <i>All patients</i> | <i>SCC</i>  | <i>Adenocarcinoma</i> | <i>P-value</i> |
|---------------|----------------------------|---------------------|-------------|-----------------------|----------------|
|               |                            | (N = 4628)          | (N = 3588)  | (N = 1040)            |                |
|               |                            | n (%)               | n (%)       | n (%)                 |                |
| Stage I       | Unchanged pathologic stage | 3234 (81.0)         | 2512 (81.2) | 722 (80.2)            | .5038          |
|               | Up-pathologic stage        | 759 (19.0)          | 581 (18.8)  | 178 (19.8)            |                |
| Stage IIA     | Down-pathologic stage      | 78 (21.3)           | 63 (20.9)   | 15 (23.1)             | .7841          |
|               | Unchanged pathologic stage | 162 (44.3)          | 132 (43.9)  | 30 (46.2)             |                |
| Stage IIB     | Up-pathologic stage        | 126 (34.4)          | 106 (35.2)  | 20 (30.8)             | .0005          |
|               | Down-pathologic stage      | 19 (12.6)           | 13 (11.4)   | 6 (16.2)              |                |
| Stage III-IVA | Unchanged pathologic stage | 74 (49.0)           | 66 (57.9)   | 8 (21.6)              | .4774          |
|               | Up-pathologic stage        | 58 (38.4)           | 35 (30.7)   | 23 (62.2)             |                |
|               | Down-pathologic stage      | 12 (10.2)           | 74 (92.5)   | 35 (92.1)             |                |
|               | Up-pathologic stage        | 97 (82.2)           | 9 (7.6)     | 6 (7.5)               |                |
|               |                            |                     |             | 3 (7.9)               |                |

SCC, squamous cell carcinoma; FIGO, International Federation of Gynecology and Obstetrics.

**Supplementary Table 2.** Survival rate of all-cause mortality by the Kaplan-Meier method

|                                       | Patient (n) | Event (n)<br>(%) | Survival rate |     |     | Survival time (month) |              |
|---------------------------------------|-------------|------------------|---------------|-----|-----|-----------------------|--------------|
|                                       |             |                  | 1 y           | 3 y | 5 y | Median                | 95% CI       |
| <i>All patients</i>                   |             |                  |               |     |     |                       |              |
| SCC                                   | 3588        | 451 (12.57)      | .98           | .93 | .90 |                       |              |
| Adenocarcinoma                        | 1040        | 222 (21.35)      | .97           | .87 | .80 |                       |              |
| <i>AJCC pathologic Stages I-IIA</i>   |             |                  |               |     |     |                       |              |
| SCC                                   | 2790        | 206 (7.38)       | .99           | .97 | .95 | -                     |              |
| Adenocarcinoma                        | 788         | 79 (10.03)       | .99           | .95 | .92 | -                     |              |
| <i>AJCC pathologic Stages IIB-IVA</i> |             |                  |               |     |     |                       |              |
| SCC                                   | 798         | 245 (30.70)      | .96           | .81 | .74 | -                     | -            |
| Adenocarcinoma                        | 252         | 143 (56.75)      | .90           | .59 | .42 | 3.73                  | (3.16, 4.66) |

SCC, squamous cell carcinoma; CI, confidence intervals; AJCC, American Joint Committee on Cancer.

## Outcomes of surgery for cervical SCC and ADC

**Supplementary Table 3.** Patient Characteristics of the propensity score matching cohort

|                          |                                | AJCC pathologic stages I-IIA |                          |         | AJCC pathologic stages IIB-IVA |                          |         |
|--------------------------|--------------------------------|------------------------------|--------------------------|---------|--------------------------------|--------------------------|---------|
|                          |                                | SCC (N = 1218)               | Adenocarcinoma (N = 667) | P-value | SCC (N = 384)                  | Adenocarcinoma (N = 210) | P-value |
|                          |                                | n (%)                        | n (%)                    |         | n (%)                          | n (%)                    |         |
| Age, years               | 0-39                           | 213 (17.5)                   | 119 (17.8)               | -       | 44 (11.5)                      | 23 (11.0)                | -       |
|                          | 40-49                          | 437 (35.9)                   | 246 (36.9)               |         | 107 (27.9)                     | 59 (28.1)                |         |
|                          | 50-59                          | 372 (30.5)                   | 198 (29.7)               |         | 147 (38.3)                     | 78 (37.1)                |         |
|                          | 60-69                          | 152 (12.5)                   | 82 (12.3)                |         | 72 (18.8)                      | 40 (19.0)                |         |
|                          | 70+                            | 44 (3.6)                     | 22 (3.3)                 |         | 14 (3.6)                       | 10 (4.8)                 |         |
| AJCC pathologic stage    | 1                              | 1156 (94.9)                  | 633 (94.9)               | -       |                                |                          |         |
|                          | 2A                             | 62 (5.1)                     | 34 (5.1)                 |         |                                |                          |         |
|                          | 2B                             |                              |                          |         | 45 (11.7)                      | 24 (11.4)                | -       |
|                          | 3                              |                              |                          |         | 289 (75.3)                     | 151 (71.9)               |         |
|                          | 4                              |                              |                          |         | 50 (13.0)                      | 35 (16.7)                |         |
| Year of diagnosis        | 2007-2009                      | 438 (36.0)                   | 207 (31.0)               | .1483   | 122 (31.8)                     | 62 (29.5)                | .8714   |
|                          | 2010-2012                      | 443 (36.4)                   | 266 (39.9)               |         | 154 (40.1)                     | 86 (41.0)                |         |
|                          | 2013-2015                      | 337 (27.7)                   | 194 (29.1)               |         | 108 (28.1)                     | 62 (29.5)                |         |
| Grade                    | I (well differentiated)        | 126 (10.3)                   | 118 (17.7)               | .1478   | 14 (3.6)                       | 11 (5.2)                 | .9974   |
|                          | II (moderately differentiated) | 654 (53.7)                   | 331 (49.6)               |         | 243 (63.3)                     | 129 (61.4)               |         |
|                          | III (poorly differentiated)    | 194 (15.9)                   | 98 (14.7)                |         | 91 (23.7)                      | 51 (24.3)                |         |
|                          | IV (undifferentiated)          | 8 (0.7)                      | 5 (0.7)                  |         | 36 (9.4)                       | 19 (9.1)                 |         |
|                          | Missing                        | 236 (19.4)                   | 115 (17.2)               |         | 0                              | 0                        |         |
| Surgical margin          | No residual                    | 1124 (92.3)                  | 615 (92.2)               | .8654   | 291 (75.8)                     | 159 (75.7)               | .9009   |
|                          | Residual                       | 35 (2.9)                     | 17 (2.5)                 |         | 67 (17.4)                      | 38 (18.1)                |         |
|                          | Unknown                        | 59 (4.8)                     | 35 (5.2)                 |         | 26 (6.8)                       | 13 (6.2)                 |         |
| Adjuvant treatment       | Adjuvant CCRT                  | 101 (8.3)                    | 61 (9.1)                 | .9998   | 204 (53.1)                     | 104 (49.5)               | .8408   |
|                          | Adjuvant sequential CT and RT  | 15 (1.2)                     | 10 (1.5)                 |         | 35 (9.1)                       | 26 (12.4)                |         |
|                          | Adjuvant RT                    | 156 (12.8)                   | 83 (12.4)                |         | 70 (18.2)                      | 38 (18.1)                |         |
|                          | No adjuvant                    | 946 (77.7)                   | 513 (76.9)               |         | 75 (19.5)                      | 42 (20.0)                |         |
| RT cumulative dose       | No RT                          | 961 (78.9)                   | 523 (78.4)               | .7930   | 110 (28.6)                     | 68 (32.4)                | .4556   |
|                          | <50 Gy                         | 119 (9.8)                    | 70 (10.5)                |         | 109 (28.4)                     | 65 (31.0)                |         |
|                          | 50+ Gy                         | 138 (11.3)                   | 74 (11.1)                |         | 165 (43.0)                     | 77 (36.7)                |         |
| Platinum cumulative dose | No CT                          | 1102 (90.5)                  | 596 (89.4)               | .7525   | 145 (37.8)                     | 80 (38.1)                | .9099   |
|                          | <500 MG                        | 70 (5.7)                     | 38 (5.7)                 |         | 115 (29.9)                     | 66 (31.4)                |         |
|                          | 500+ MG                        | 46 (3.8)                     | 33 (4.9)                 |         | 124 (32.3)                     | 64 (30.5)                |         |

## Outcomes of surgery for cervical SCC and ADC

|                                  |                                |             |            |       |            |            |       |
|----------------------------------|--------------------------------|-------------|------------|-------|------------|------------|-------|
| Intracavitary brachytherapy dose | No intracavitary brachytherapy | 935 (76.8)  | 518 (77.7) | .6904 | 123 (32.0) | 73 (34.8)  | .8960 |
|                                  | <2500 cGy                      | 233 (19.1)  | 127 (19.0) |       | 212 (55.2) | 110 (52.4) |       |
|                                  | 2500+ cGy                      | 50 (4.1)    | 22 (3.3)   |       | 49 (12.8)  | 27 (12.9)  |       |
| CCI Scores                       | 0                              | 1012 (83.1) | 546 (81.9) | .5622 | 314 (81.8) | 167 (79.5) | .9380 |
|                                  | 1                              | 148 (12.2)  | 85 (12.7)  |       | 44 (11.5)  | 28 (13.3)  |       |
|                                  | 2+                             | 58 (4.8)    | 36 (5.4)   |       | 26 (6.8)   | 15 (7.1)   |       |
| Income                           | <NTD 18,000                    | 250 (20.5)  | 132 (19.8) | .8744 | 94 (24.5)  | 54 (25.7)  | .8204 |
|                                  | NTD 18,000-22,500              | 440 (36.1)  | 232 (34.8) |       | 133 (34.6) | 70 (33.3)  |       |
|                                  | NTD 22,500-30,000              | 175 (14.4)  | 98 (14.7)  |       | 59 (15.4)  | 28 (13.3)  |       |
|                                  | NTD 30,000+                    | 353 (29.0)  | 205 (30.7) |       | 98 (25.5)  | 58 (27.6)  |       |
| Hospital level                   | Medical center                 | 899 (73.8)  | 488 (73.2) | .8751 | 272 (70.8) | 150 (71.4) | .9226 |
|                                  | Other                          | 319 (26.2)  | 179 (26.8) |       | 112 (29.2) | 60 (28.6)  |       |
| Hospital area                    | North                          | 642 (52.7)  | 358 (53.7) | .9741 | 194 (50.5) | 105 (50.0) | .7100 |
|                                  | Central                        | 239 (19.6)  | 131 (19.6) |       | 75 (19.5)  | 46 (21.9)  |       |
|                                  | South/East                     | 337 (27.7)  | 178 (26.7) |       | 115 (29.9) | 59 (28.1)  |       |

CCRT, concurrent chemoradiotherapy; cGy, centigray; Gy, gray; SCC, squamous cell carcinoma; FIGO, International Federation of Gynecology and Obstetrics; CT, chemotherapy; RT, radiotherapy; EBRT, external beam radiotherapy; CCI, Charlson comorbidity index; MG, milligrams; SD, standard deviation; IQR, interquartile range; NTD, New Taiwan dollar, AJCC, American Joint Committee on Cancer.

**Supplementary Table 4.** Results of Cox proportional hazard regression analysis of the propensity score matched cohort

| AJCC pathologic stage | Event                   | Pathologic type | Patient (n) | Event (n)<br>(%) | Adjusted HR (95% CI) | P-value |
|-----------------------|-------------------------|-----------------|-------------|------------------|----------------------|---------|
| Stages 1-2A           | All-cause mortality     | SCC             | 1218        | 73 (5.99)        | ref.                 | <.0001  |
|                       |                         | Adenocarcinoma  | 667         | 72 (10.79)       | 2.06 (1.48-2.88)     |         |
|                       | Locoregional recurrence | SCC             | 1218        | 92 (7.55)        | ref.                 | .8558   |
|                       |                         | Adenocarcinoma  | 667         | 46 (6.90)        | 0.97 (0.67-1.39)     |         |
| Stages 2B-4           | Distant metastasis      | SCC             | 1218        | 50 (4.11)        | ref.                 | <.0001  |
|                       |                         | Adenocarcinoma  | 667         | 60 (9.00)        | 2.75 (1.86-4.05)     |         |
|                       | All-cause mortality     | SCC             | 384         | 116 (30.21)      | ref.                 | <.0001  |
|                       |                         | Adenocarcinoma  | 210         | 117 (55.71)      | 2.54 (1.94-3.32)     |         |
|                       | Locoregional recurrence | SCC             | 384         | 49 (12.76)       | ref.                 | .8027   |
|                       |                         | Adenocarcinoma  | 210         | 30 (14.29)       | 1.06 (0.66-1.72)     |         |
| Distant metastasis    | SCC                     | 384             | 93 (24.22)  | ref.             | <.0001               |         |
|                       | Adenocarcinoma          | 210             | 79 (37.62)  | 1.89 (1.39-2.57) |                      |         |

\*All the variables included in [Supplemental Table 3](#) were used in the multivariate analysis. HR, hazard ratio; CI, confidence intervals; AJCC, American Joint Committee on Cancer.

# Outcomes of surgery for cervical SCC and ADC

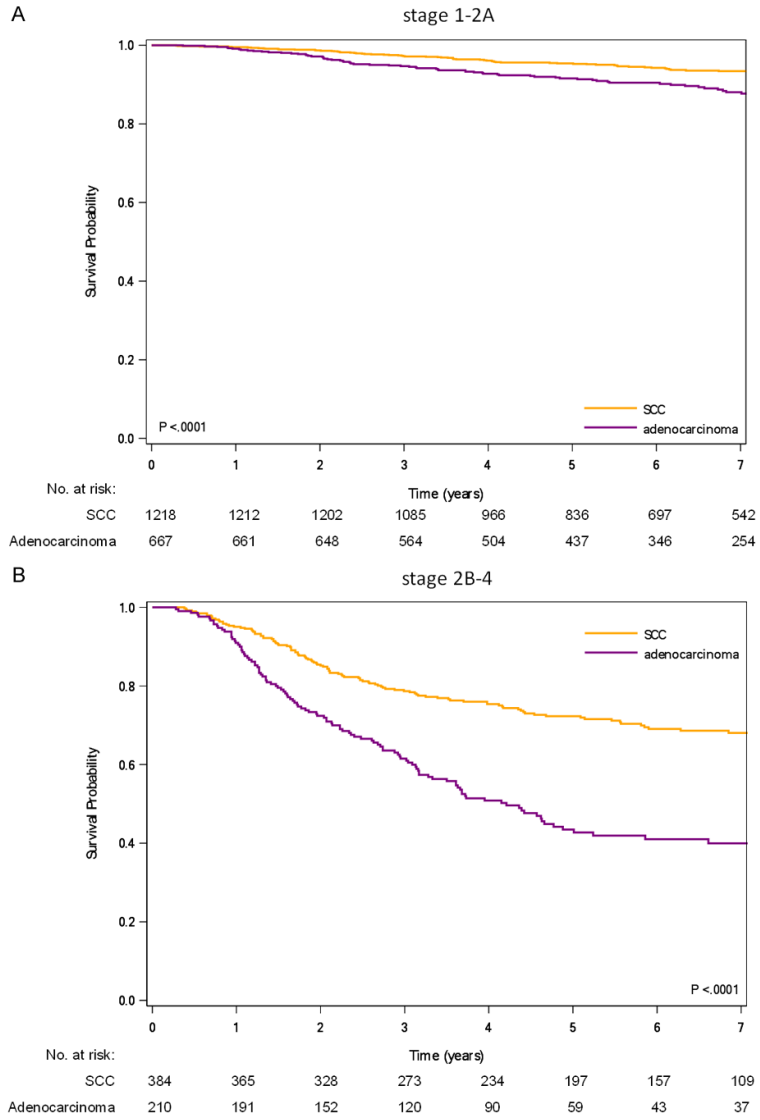

**Supplementary Figure 1.** Kaplan-Meier survival curves for all-cause death in the propensity score matched cohort. A. Stages I-IIA. B. Stages IIB-IVA.
